1 **Palmitic acid induces inflammation in placental trophoblasts and impairs their migration**  
2 **toward smooth muscle cells through plasminogen activator inhibitor-1**

3 Amanda M. Rampersaud<sup>1</sup>, Caroline E. Dunk<sup>2</sup>, Stephen J. Lye<sup>2,3</sup>, and Stephen J. Renaud<sup>1,4,¶</sup>

4

5

6 <sup>1</sup>Department of Anatomy and Cell Biology, Schulich School of Medicine and Dentistry,  
7 University of Western Ontario, London, Ontario, Canada

8 <sup>2</sup>Research Centre for Women's and Infants' Health, Lunenfeld-Tanenbaum Research Institute,  
9 Sinai Health System, Toronto, Ontario, Canada

10 <sup>3</sup>Department of Obstetrics and Gynecology, Faculty of Medicine, University of Toronto,  
11 Toronto, Ontario, Canada

12 <sup>4</sup>Children's Health Research Institute, Lawson Health Research Institute, London, Ontario,  
13 Canada

14

15

16 <sup>¶</sup>To whom correspondence can be addressed: Stephen J Renaud, Department of Anatomy and  
17 Cell Biology, University of Western Ontario, 1151 Richmond St, London, Ontario, Canada,  
18 N6A5C1. Tel: 1-519-661-2111 ext 88272, Fax: 1-519-661-3936, email: srenaud4@uwo.ca

19

20 **Running title:** Palmitic acid impairs trophoblast migration.

21 **Abstract**

22 A critical component of early human placental development includes migration of extravillous  
23 trophoblasts (EVTs) into the decidua. EVT migrate toward, and displace vascular smooth  
24 muscle cells (SMCs) surrounding several uterine structures, including spiral arteries. Shallow  
25 trophoblast invasion features in several pregnancy complications including preeclampsia.  
26 Maternal obesity is a risk factor for placental dysfunction, suggesting that factors within an obese  
27 environment may impair early placental development. Herein, we tested the hypothesis that  
28 palmitic acid, a saturated fatty acid circulating at high levels in obese women, induces an  
29 inflammatory response in EVT that hinders their capacity to migrate toward SMCs. We found  
30 that SMCs and SMC-conditioned media stimulated migration and invasion of an EVT-like cell  
31 line, HTR8/SVneo. Palmitic acid impaired EVT migration and invasion toward SMCs, and  
32 induced expression of several vasoactive and inflammatory mediators in EVT, including  
33 endothelin, interleukin (IL)-6, IL8, and PAI1. PAI1 was increased in plasma of women with  
34 early-onset preeclampsia, and PAI1-deficient EVT were protected from the anti-migratory  
35 effects of palmitic acid. Using first trimester placental explants, palmitic acid exposure decreased  
36 EVT invasion through Matrigel. Our findings reveal that palmitic acid induces an inflammatory  
37 response in EVT and attenuates their migration through a mechanism involving PAI1. High  
38 levels of palmitic acid in pathophysiological situations like obesity may impair early placental  
39 development and predispose to placental dysfunction.

40

41 **Keywords**

42 Extravillous trophoblasts, Smooth muscle cells, Obesity, Palmitic acid, Plasminogen activator

43 inhibitor-1, Cell migration

## 44 **Introduction**

45 Extravillous trophoblast (EVT) migration is a critical component of human placentation.  
46 EVTs migrate into the decidua as far as the inner third of the myometrium, anchor the placenta to  
47 the uterus, integrate into various uterine structures (including endometrial glands and blood  
48 vessels) and transform the tissue architecture of the maternal-placental interface [1]. Migrating  
49 EVTs displace smooth muscle cells (SMCs) surrounding uterine spiral arteries [2,3],  
50 transforming these vessels into low-resistance conduits capable of providing the placenta with a  
51 consistent supply of maternal blood that gently bathes the delicate surfaces of the chorionic villi.  
52 Defects in EVT migration cause shallow spiral artery remodeling, and are linked to serious  
53 pregnancy complications including preeclampsia, which is a major cause of maternal and fetal  
54 sickness and mortality [4].

55 Maternal obesity is a major risk factor for placental dysfunction and various obstetric  
56 complications [5–8]. A study evaluating depth of spiral artery remodeling in stillbirths found that  
57 elevated body mass index (BMI) was the only maternal characteristic that significantly  
58 associated with poor spiral artery remodeling [9]. In rats, a species that, like humans, relies on  
59 deep trophoblast invasion for pregnancy success, diet-induced obesity impairs trophoblast  
60 migration and spiral artery remodeling, and triggers placental inflammation [10]. Therefore,  
61 factors within an obesogenic milieu may impact early aspects of placental development such as  
62 EVT migration, and predispose to adverse pregnancy outcomes.

63 Obesity is associated with elevated plasma levels of free fatty acids [11,12]. In particular,  
64 plasma levels of saturated long-chain fatty acids such as palmitic acid are higher in individuals  
65 with elevated BMI [13], including pregnant women with elevated pre-pregnancy BMI or  
66 excessive gestational weight gain [14]. Palmitic acid is the most common saturated fatty acid in



67 the human body. It has a sixteen-carbon backbone (16:0), and is obtained through dietary intake  
68 or synthesized endogenously from other macronutrients. High levels of palmitic acid modulate  
69 cellular metabolism and promote production of inflammatory mediators in several cell-types  
70 [15–19]. In primary cytotrophoblasts isolated from term placentas, palmitic acid (and stearic acid  
71 – another long-chain saturated fatty acid) activates toll-like receptor 4 and stimulates production  
72 of pro-inflammatory cytokines including tumor necrosis factor alpha, interleukin (IL)-6, and IL-8  
73 [20]. These effects are not observed in cytotrophoblasts exposed to unsaturated fatty acids,  
74 indicating that saturated fatty acids such as palmitic acid may be uniquely capable of promoting  
75 inflammation at the maternal-placental interface. In some cell-types, palmitic acid also induces  
76 expression of plasminogen activator inhibitor-1 (PAI1) [21], a serine protease inhibitor and  
77 powerful regulator of hemostasis, fibrinogenesis and cell migration. PAI1 inhibits EVT motility  
78 in vitro, and levels are elevated in pregnancy complications characterized by deficient  
79 placentation (e.g. preeclampsia and unexplained recurrent pregnancy loss)[22]. Since excessive  
80 inflammation and production of PAI1 is associated with compromised trophoblast function and  
81 predisposes to poor placentation [23–26], herein we hypothesize that palmitic acid stimulates  
82 expression of PAI1 and other inflammatory mediators in EVTs, and reduces their migratory  
83 potential.

84 In this study, we investigated the effect of SMCs on EVT migration, using co-cultures of  
85 vascular SMCs with a well-established EVT-like cell-line as a model system. Next, we  
86 determined whether palmitic acid affects migration of EVTs toward SMCs, and we profiled  
87 expression of inflammatory mediators, including PAI1, by EVTs following exposure to palmitic  
88 acid. We found that palmitic acid stimulates inflammatory pathways in EVTs and impairs their  
89 migratory potential. Moreover, we identified PAI1 as a central mediator of the anti-migratory

90 effects of palmitic acid. Our results suggest that high levels of palmitic acid in susceptible  
91 individuals may contribute to a suboptimal maternal-placental interface and predispose to  
92 deficient placentation.

## 93 **Methods**

94 **Cells.** HTR8/SVneo cells (henceforth called HTR8 EVTs), a well-established human first  
95 trimester EVT-like cell-line derived from placental explant outgrowths [27], were maintained in  
96 standard culture conditions (37°C, 5% CO<sub>2</sub>) with RPMI-1640 medium containing 5% fetal  
97 bovine serum (FBS), 100 units/ml penicillin, and 100 μM streptomycin (Sigma-Aldrich) for no  
98 more than twenty sequential passages. The number of viable HTR8 EVTs was assessed by  
99 staining with trypan blue and counting with a hemocytometer.

100 Primary SMCs derived from human aorta (Cell Applications 354-05a) were maintained  
101 in proprietary growth media (Cell Applications 311-500). Cells were plated at a density of  $1.5 \times$   
102  $10^4$  cells/cm<sup>2</sup>, and grown in standard culture conditions for up to 15 passages. To differentiate  
103 cells to a contractile phenotype,  $1.0 \times 10^4$  SMCs/cm<sup>2</sup> were plated, and growth medium was  
104 replaced with SMC differentiation medium (Cell Applications 311D-250) for up to seven days.  
105 To produce SMC conditioned media, SMCs were differentiated for 5 days, then new  
106 differentiation medium was provided and conditioned for 48 h. Conditioned media were then  
107 removed, centrifuged, and used for experiments.

108 Primary human uterine microvascular endothelial cells (PromoCell C-12295) were  
109 maintained in proprietary growth media (PromoCell C-22020). Cells were plated at a density of  
110  $2.0 \times 10^4$  cells/cm<sup>2</sup> and grown in standard culture conditions for up to 10 passages.

111 Human embryonic kidney (HEK)-293T cells were maintained in standard culture  
112 conditions with Dulbecco's Modified Eagle's Medium (DMEM) containing 10% FBS, 100  
113 units/ml penicillin, and 100 μM streptomycin for up to twenty passages.

114

115 **Tissue collection.** Informed written consent was obtained from each patient in accordance with  
116 the Declaration of Helsinki. Collections were approved by the Morgentaler Clinic and the Mount  
117 Sinai Hospital Research Ethics Board (Toronto, Canada; REB12-0007E).

118 For collection of plasma, blood samples were procured from healthy non-pregnant  
119 women, pregnant women during mid-second trimester (15.2-17.2 weeks), and third-trimester  
120 pregnant women with or without early-onset preeclampsia. Clinical measures of patients are  
121 provided in Table 1. Blood samples were collected in sterile tubes containing  
122 ethylenediaminetetraacetic acid-dipotassium salt, and plasma was immediately separated from  
123 peripheral blood mononuclear cells and polymorphonuclear leukocytes using a dual density  
124 gradient separation kit (Histopaque 1119/1077, Sigma-Aldrich), according to the manufacturer's  
125 protocol. Plasma was aliquoted and stored at -80°C until use.

126 First trimester (5-8 week) placentas, obtained at the time of elective terminations of  
127 pregnancy, were used to prepare placental explants as previously described [28]. Villous explants  
128 were dissected, washed in PBS, and embedded on Matrigel-coated culture inserts (0.4- $\mu$ m pores,  
129 12-mm diameter; EMD Millipore). Inserts were placed into wells containing serum-free  
130 DMEM/F12 media containing 100 U/ml penicillin/streptomycin, 2 mM L-glutamine, 100  $\mu$ g/ml  
131 gentamicin, and 2.5  $\mu$ g/ml fungizone, and were incubated at 37°C with an atmosphere containing  
132 3% O<sub>2</sub> and 5% CO<sub>2</sub>. 48-h following plating, adherent explants that initiated EVT outgrowths  
133 were given SMC-conditioned media containing either BSA or 125  $\mu$ M palmitic acid for 72 h.  
134 Outgrowth area was measured using Image J software [29]. Each treatment was conducted in  
135 triplicate, and repeated using explants from six different placentas. To determine depth of EVT  
136 invasion, the Matrigel plug (containing invaded EVTs) was fixed in 4% paraformaldehyde,  
137 embedded in paraffin, and 5- $\mu$ m serial sections prepared. Sections were rehydrated and stained

138 using hematoxylin and eosin to identify invading EVT. The depth of EVT invasion into  
139 Matrigel was then calculated based on the number of consecutive sections in which EVTs were  
140 detected.

141  
142 **Treatments.** To prepare fatty acids, 30% fatty acid-free bovine serum albumin (BSA) was  
143 conjugated 2:1 to either 20 mM palmitic acid or oleic acid, and added to SMC conditioned media  
144 at final concentrations of 125, 250, and 500  $\mu$ M (Sigma-Aldrich). Controls consisted of medium  
145 containing an equivalent amount of BSA. Activity of P38-MAPK was inhibited using 10  $\mu$ M  
146 SB203580 (P38-MAPK inhibitor); activity of ERK1/2 was inhibited using 10  $\mu$ M U0126 (MEK  
147 inhibitor). Both inhibitors were dissolved in dimethyl sulfoxide (DMSO). SMC-conditioned  
148 media containing DMSO was used as control for these experiments.

149  
150 **Immunofluorescence.** Cells were fixed with 4% paraformaldehyde, permeabilized using 0.3%  
151 Triton X-100, blocked in 10% normal goat serum (ThermoFisher Scientific), and immersed in  
152 antibodies targeting  $\alpha$ -smooth muscle actin (A2547, 1:400, Sigma Aldrich), calponin (D8L2T,  
153 1:50, Cell Signaling Technology), or transgelin (sc-53932, 1:50, Santa Cruz Biotechnology).  
154 Cells were then incubated with species-appropriate fluorescent antibodies (AlexaFluor,  
155 ThermoFisher Scientific), and nuclei counterstained using 4', 6-diamidino-2-phenylindole  
156 (DAPI, ThermoFisher Scientific). Cells were imaged using a Zeiss Axio fluorescence  
157 microscope.

158  
159 **5-ethynyl-2'-deoxyuridine incorporation assay.**  $5 \times 10^4$  HTR8 EVTs were seeded onto Poly-D  
160 lysine-coated coverslips. The following day, 10  $\mu$ M 5-ethynyl-2'-deoxyuridine (EdU, dissolved

161 in culture media) was added to cells for 4 h. Cells were fixed using 4% paraformaldehyde and  
162 detection of EdU was performed according to the manufacturer's instructions (ClickiT EdU  
163 Proliferation Kit, ThermoFisher Scientific). Nuclei were detected using Hoechst. Cells were  
164 imaged with a Zeiss Axio fluorescence microscope. The total number of cells and number of  
165 EdU-positive cells were counted in three random non-overlapping fields of view per well, and  
166 percentage of EdU-positive cells was calculated.

167  
168 **Cell viability and apoptosis assays.** HTR8 EVT<sub>s</sub> were seeded at  $5 \times 10^4$  cells/cm<sup>2</sup>. The  
169 following day, SMC conditioned media containing BSA, palmitic acid, or oleic acid were added  
170 for 24 h. As a positive control, 10  $\mu$ M camptothecin (Cell Signaling Technology) was added to  
171 cells for 24 h. Cells were then trypsinized, centrifuged, and incubated with annexin V and  
172 propidium iodide (PI) as per the manufacturer's instructions (Early Apoptosis Detection Kit, Cell  
173 Signaling Technology). Cells were analyzed by flow cytometry using a BD FACSCanto cell  
174 analyzer (BD Biosciences). Data were analyzed using FlowJo software. Gating strategies can be  
175 found in Supplemental Figure 1. In brief, gating commenced with a forward scatter area versus  
176 forward scatter height plot to remove doublets, followed by a second gate on forward scatter area  
177 versus side scatter area to remove obvious debris from the plot while retaining both live and dead  
178 cells. Single-stained positive control cells on annexin V versus PI plots were gated on this  
179 population, which was also used to derive the frequencies shown in Figure 3.

180  
181 **Transwell migration and invasion assays.** To measure cell migration,  $2.0 \times 10^4$  HTR8 EVT<sub>s</sub>  
182 were placed into transwell inserts (8- $\mu$ m pore, 6.5-mm diameter, Greiner BioOne). Media  
183 containing  $3.8 \times 10^4$  human uterine microvascular endothelial cells,  $1.9 \times 10^4$  synthetic SMCs,

184  $1.9 \times 10^4$  contractile SMCs, or conditioned media from contractile SMCs containing either fatty  
185 acids or inhibitors (see cell treatments) were added to the lower chamber. Cells were incubated in  
186 standard culture conditions for 24 h. Cells in the upper portion of the transwell were removed  
187 with a cotton swab. Cells attached to the underside of the membrane were fixed in methanol,  
188 then stained with Diff-Quik cytometry stain (GE Healthcare). Membranes were excised, placed  
189 onto slides, and counted using a bright-field microscope. Normalized migration indices were  
190 calculated by dividing the number of cells that migrated under both control and treatment  
191 conditions by the mean number of cells that migrated in control conditions, as done previously  
192 [30]. This normalization step was performed to determine the relative change in cell migration  
193 for each experiment, which facilitated comparisons between experiments.

194 Cell invasion was assessed by precoating transwells with growth factor-reduced Matrigel  
195 (BD Biosciences, 400  $\mu\text{g/ml}$  diluted in serum-free RPMI-1640) for 3 h. Medium was removed,  
196 and then  $4.0 \times 10^4$  HTR8 EVT cells were placed on top of the Matrigel. All other steps were the  
197 same as described above. Normalized invasion indices were determined by dividing the number  
198 of cells that invaded under both control and treatment conditions by the mean number of cells  
199 that invaded in control conditions.

200  
201 **Immunohistochemistry.** Explants were fixed in 4% paraformaldehyde, embedded in paraffin,  
202 and sectioned at 5- $\mu\text{m}$  thickness. Sections were deparaffinized, rehydrated, blocked, and  
203 immersed in primary antibodies specific for proliferating cell nuclear antigen (PCNA; sc-56,  
204 1:200, Santa Cruz Biotechnology) or human leukocyte antigen-G (HLA-G; sc-21799, 1:50, Santa  
205 Cruz Biotechnology). The following day, species-appropriate fluorescent antibodies were  
206 applied (AlexaFluor, ThermoFisher Scientific), and DAPI was used to counterstain nuclei.

207 Sections were mounted with Fluoromount-G (SouthernBiotech), and images acquired using a  
208 Nikon DS-Qi2 microscope.

209

210 **Western blot analysis.** Cells were lysed using 1× Laemmli sample buffer (2% sodium dodecyl  
211 sulfate, 10% glycerol, 5% 2-mercaptoethanol, 0.002% bromophenol, 0.125 M Tris-HCl and 0.5  
212 M dithiothreitol) supplemented with phenylmethylsulfonyl fluoride, boiled, and loaded onto  
213 sodium dodecyl sulfate-containing polyacrylamide gels. Proteins were separated using gel  
214 electrophoresis, and transferred to polyvinylidene difluoride membranes (GE Healthcare).  
215 Membranes were blocked with 3% BSA in TBS containing 0.1% Tween-20, and probed using  
216 antibodies targeting  $\alpha$ -smooth muscle actin (A2547, 1:2000, Sigma Aldrich), calponin (D8L2T,  
217 1:1000, Cell Signaling Technology), transgelin (SC-53932, 1:500, Santa Cruz Biotechnology),  
218 P38-MAPK (D13E1, 1:1000, Cell Signaling Technology), phosphorylated P38-MAPK (D3F9,  
219 1:1000, Cell Signaling Technology), ERK1/2 (9102, 1:1000, Cell Signaling Technology),  
220 phosphorylated ERK1/2 (E10, 1:2000, Cell Signaling Technology), focal adhesion kinase (FAK;  
221 D507U, 1:1000, Cell Signaling Technology), and phosphorylated FAK (8556, 1:1000, Cell  
222 Signaling Technology). Expression of  $\alpha$ -tubulin (CP06, 1:1000, Calbiochem) was used as a  
223 loading control. Proteins were detected using a LI-COR Odyssey imaging system (LI-COR  
224 Biosciences) following incubation with species-appropriate, infrared-conjugated secondary  
225 antibodies (Cell Signaling Technology).

226

227 **Taqman PCR array and quantitative RT-PCR.** RNA was extracted using TriZol  
228 (ThermoFisher Scientific). The aqueous phase was diluted 1:1 with 70% ethanol, placed on  
229 RNeasy columns (Qiagen), treated with DNase I, and purified. Complementary DNA was



230 generated from purified RNA using High Capacity Reverse Transcription kit (ThermoFisher  
231 Scientific), diluted 1:10, and used for quantitative RT-PCR (qRT-PCR). Relative mRNA levels  
232 of a panel of inflammation-associated genes were initially screened using a Human Immune  
233 Taqman PCR array (4418718, ThermoFisher Scientific) and Taqman Fast Advanced Master Mix.  
234 A CFX Connect Real-Time PCR system (Bio-Rad Laboratories) was used for amplification and  
235 fluorescence detection. The cycling conditions included an initial uracil-N-glycosylase step (50  
236 for 2 min), followed by enzyme inactivation (95°C for 20 s), and then 40 cycles of two-step PCR  
237 (95°C for 1 s then 60°C for 20 s). Four reference genes (*18S*, *GAPDH*, *HPRT1*, and *GUSB*) were  
238 also analyzed in the array, and their expressions were stable among the conditions tested.  
239 Transcript levels of select genes (*EDNI*, *IL6*, *LIF*, *IL1A*, *PTGS2*, and *VEGFA*) were validated on  
240 independent samples using qRT-PCR with predesigned Taqman probes (ThermoFisher  
241 Scientific, Table 1) and *18S* as a reference RNA. All other qRT-PCR analyses were conducted  
242 using cDNA mixed with SensiFAST SYBR Green PCR Master Mix (FroggaBio) and primers  
243 described in Table 2. Cycling conditions included an initial holding step (95°C for 3 min),  
244 followed by 40 cycles of two-step PCR (95°C for 10 s, 60°C for 45 s), then a dissociation step  
245 (65°C for 5 s, and a sequential increase to 95°C). Relative mRNA expression was calculated  
246 using the comparative cycle threshold ( $\Delta\Delta C_t$ ) method, using *18S* as a reference RNA.

247  
248 **Enzyme immunoassay.** Levels of PAI1 in human plasma were measured using a Bio-Plex  
249 multiplex enzyme immunoassay (Customized Human Cancer Biomarker Assay, Bio-Rad  
250 Laboratories). Plasma was diluted 1:4 in assay diluent prior to performing the assay. Levels of  
251 PAI1 in media conditioned by HTR8 EVT<sub>s</sub> were measured using a Human Total PAI1 enzyme  
252 immunoassay (DY9387-05, Biotechne), as per the manufacturer's instructions. A standard curve

253 was generated using absorbance values plotted against defined concentrations of recombinant  
254 PAII. Conditioned media were diluted in assay buffer to ensure absorbance values fell within the  
255 linear range of the standard curve.

256

257 **Lentivirus production.** Lentivirus-encapsulated short hairpin RNAs (shRNAs) were generated  
258 to knockdown *SERPINE1* gene expression. Briefly, HEK-293T cells were transfected using  
259 Lipofectamine 2000 (ThermoFisher Scientific) with lentiviral packaging plasmids (MD2.G,  
260 MDLG/RRE, and RSV-Rev) and a *SERPINE1* shRNA construct encoded in a PLKO.1 vector  
261 (henceforth called shPAII: TRCN0000370159, sense: ACACCCTCAGCATGTTCATTG;  
262 Sigma-Aldrich). A control PLKO.1 vector containing a scrambled shRNA (Addgene 1864) was  
263 used as a control. Lentivirus-containing culture supernatants were collected at 24 h and 48 h, and  
264 stored at -80°C until use. To transduce HTR8 EVT<sub>s</sub>, cells were exposed to lentiviral particles for  
265 24 h in the presence of 8 µg/ml hexadimethrine bromide, as described previously [31]. After 48-  
266 h infection, transduced cells were selected with puromycin (3.5 µg/ml).

267

268 **Statistical analysis.** Statistical comparisons between two means were tested using Student's t-  
269 test; statistical comparisons between three or more means were assessed using analysis of  
270 variance, followed by Tukey's post-hoc analysis. A two-way ANOVA followed by a Sidak's  
271 multiple comparison test was performed to compare HTR8 EVT<sub>s</sub> transduced with shRNAs and  
272 then exposed to BSA or palmitic acid. Means were considered statistically different when  
273  $P < 0.05$ . GraphPad Prism 7.0 was used for all graphing and statistical analysis. The Human  
274 Immune PCR array was conducted using one replicate; all other experiments were repeated at

275 least three independent times. The specific number of replicates is indicated in the figure

276 legends.

277

278 **Results**

279 **SMCs stimulate EVT migration and invasion.**

280 EVTs migrate chemotactically toward several uterine structures containing vascular SMCs.  
281 Therefore, to determine whether SMCs drive migration of EVTs, human vascular SMCs were  
282 first differentiated to a contractile phenotype, reminiscent of vascular SMCs surrounding spiral  
283 arteries in first trimester human decidua. When cultured under differentiation conditions,  
284 vascular SMCs progressively increased levels of calponin,  $\alpha$ -smooth muscle actin, and  
285 transgelin, and possessed morphological characteristics consistent with a contractile phenotype  
286 (Supplemental Figure 2). We then placed uncoated or Matrigel-coated transwells harboring  
287 HTR8 EVTs into wells containing differentiated SMCs, to determine whether SMCs drive  
288 migration of EVTs (Figure 1A). Compared to control conditions in which SMCs were absent, the  
289 presence of SMCs increased HTR8 EVT migration by 16-fold (Figure 1B,  $P=0.0001$ ) and  
290 increased invasion by 2.6-fold (Figure 1C,  $P<0.0001$ ). Although undifferentiated (synthetic)  
291 SMCs and human uterine microvascular endothelial cells enhanced migration of HTR8 EVTs,  
292 the extent of migration was not as robust as with differentiated SMCs (3.5-fold and 1.5-fold  
293 respectively,  $P=0.0004$  and  $P=0.0002$ , Supplemental Figure 3).

294 To determine whether factors secreted by SMCs stimulated EVT migration, transwells  
295 containing HTR8 EVTs were placed into wells containing media conditioned by contractile  
296 SMCs (Figure 1D). Compared to unconditioned media, vascular SMC-conditioned media  
297 increased HTR8 EVT migration by 7.4-fold (Figure 1E,  $P=0.0002$ ), and increased invasion  
298 through Matrigel by 2.2-fold (Figure 1F,  $P=0.0005$ ). To investigate whether SMCs affect  
299 proliferation of HTR8 EVTs, EdU incorporation and trypan blue viability assays were  
300 performed. There was no significant difference in the number of proliferating or viable cells

301 cultured with SMC-conditioned media versus unconditioned media (Figure 1G and H). These  
302 results suggest that SMCs drive migration and invasion of HTR8 EVT, and that this effect is not  
303 due to altered cell proliferation.

304

305 **SMC conditioned media induces phosphorylation of kinases required for EVT migration.**

306 To determine whether contractile SMCs enhance phosphorylation of kinases required for  
307 migration of EVT, we treated HTR8 EVT with media conditioned by differentiated SMCs, and  
308 assessed phosphorylation of signalling factors implicated in EVT migration. There was no  
309 change in phosphorylated levels of FAK following exposure of HTR8 EVT to SMC conditioned  
310 media, whereas levels of phosphorylated P38-MAPK and ERK1/2 were increased 3 h and 1 h  
311 following exposure to SMC conditioned media, respectively (Figure 2A). Total levels of these  
312 kinases were consistent among all treatment conditions. Addition of SB203580 (P38-MAPK  
313 inhibitor) to SMC conditioned media resulted in an 84% decrease in HTR8 EVT migration  
314 compared to vehicle control (Figure 2B,  $P < 0.0001$ ), whereas treatment with U0126 (MEK  
315 inhibitor) inhibited migration by 75% (Figure 2C,  $P < 0.0001$ ). These results suggest that P38-  
316 MAPK and ERK1/2 signalling are involved, at least in part, in vascular SMC-induced HTR8  
317 EVT migration.

318

319 **Palmitic acid inhibits EVT migration and invasion.**

320 Serum levels of palmitic acid are elevated in obese pregnancies, which are associated with poor  
321 EVT-directed spiral artery remodeling. Therefore, we next determined whether palmitic acid  
322 affects SMC-induced HTR8 EVT migration and invasion. In preliminary experiments, EVT  
323 viability was compromised following exposure to 250  $\mu$ M and 500  $\mu$ M palmitic acid (not

324 shown), but not following exposure to 125  $\mu$ M palmitic acid, so a dose of 125  $\mu$ M palmitic acid  
325 was used for all subsequent experiments. Addition of palmitic acid to SMC-conditioned media  
326 resulted in a 91% decrease in HTR8 EVT migration and a 57% decrease in HTR8 EVT invasion,  
327 compared to cells exposed to BSA (Figure 3,  $P < 0.0001$  for both). To determine if these effects  
328 were due to the bioactive properties of palmitic acid, we included an additional treatment group  
329 in which 125  $\mu$ M oleic acid (an unsaturated fatty acid) was added to media conditioned by  
330 SMCs. Addition of oleic acid had no effect on the capacity of HTR8 EVTs to migrate or invade  
331 (Figure 3A and B). To confirm that 125  $\mu$ M palmitic acid or oleic acid did not affect viability of  
332 HTR8 EVTs, annexin V and PI expression were determined by flow cytometry. The number of  
333 apoptotic (annexin V and PI-positive) and necrotic (PI-positive) cells did not significantly differ  
334 between HTR8 EVTs exposed for 24 h to 125  $\mu$ M palmitic acid, oleic acid, or BSA. In contrast,  
335 exposure of HTR8 EVTs to camptothecin caused a much higher percentage of cells to be  
336 apoptotic and necrotic (Figure 3C,  $P = 0.01$  and  $P = 0.001$ ). These results demonstrate that palmitic  
337 acid impairs SMC-induced migration and invasion of HTR8 EVTs through a mechanism not  
338 involving decreased cell viability.

339

#### 340 **Palmitic acid induces a pro-inflammatory response in EVTs.**

341 Palmitic acid promotes proinflammatory cytokine production in several cell-types [32].  
342 Therefore, to examine whether palmitic acid alters expression of inflammation-associated genes  
343 in EVTs, cDNA was prepared from HTR8 EVTs exposed to palmitic acid or BSA, and a PCR  
344 array was used to screen inflammation-associated genes potentially induced following palmitic  
345 acid exposure. The array included probes for ninety-two distinct genes associated with  
346 inflammation, along with four housekeeping genes. Thirty-three inflammation-associated genes

347 were expressed (normalized expression >0.001) in HTR8 EVT<sub>s</sub> following exposure to either  
348 BSA or palmitic acid (Figure 4A). Expression of seven genes (*VEGFA*, encodes vascular  
349 endothelial growth factor A; *LIF*, encodes leukemia inhibitory factor; *PTGS2*, encodes  
350 cyclooxygenase 2; *END1*, encodes endothelin-1; *IL6*, encodes IL-6; *IL1A*, encodes IL-1 $\alpha$ ; and  
351 *CXCL8*, encodes IL-8) was increased at least 2-fold in EVT<sub>s</sub> exposed to palmitic acid, so levels  
352 of these transcripts were further assessed using qRT-PCR. Palmitic acid increased expression of  
353 *VEGFA* (1.6-fold), *EDN1* (2-fold), *IL6* (4.2-fold), and *CXCL8* (11-fold, Figure 4B, all P=0.03,  
354 0.0003, 0.02, and 0.04). Expression of *LIF* also appeared to be increased, although it did not  
355 reach statistical significance (4.5-fold, Figure 4B, P=0.056), whereas there was no statistically-  
356 significant change in *PTGS2* or *IL1A* (not shown). We additionally investigated expression of  
357 *SERPINE1*, because it encodes PAI<sub>1</sub>: a key component of fibrogenic and thrombotic pathways  
358 circulating at increased levels in obese women [33], and in women with early-onset preeclampsia  
359 (Figure 5). *SERPINE1* transcript levels in HTR8 EVT<sub>s</sub> were increased 15-fold following  
360 exposure to palmitic acid compared to controls (Figure 4B, P=0.008), and levels of PAI<sub>1</sub> in  
361 conditioned medium were increased by 62% (Figure 4C, P=0.02). Collectively, palmitic acid  
362 enhances expression of various factors associated with inflammation and fibrinogenesis in EVT<sub>s</sub>.  
363

#### 364 **Knockdown of PAI<sub>1</sub> rescues trophoblast migration following exposure to palmitic acid.**

365 To determine the contribution of elevated PAI<sub>1</sub> levels to impaired EVT migration  
366 following palmitic acid exposure, we transduced HTR8 EVT<sub>s</sub> with shRNAs targeting *SERPINE1*  
367 (shPAI<sub>1</sub>). Compared to cells receiving control shRNA, HTR8 EVT<sub>s</sub> stably expressing shPAI<sub>1</sub>  
368 exhibited reduced *SERPINE1* expression by 57%, and decreased PAI<sub>1</sub> secretion by 75% (Figure  
369 6A and B, P=0.04 and P=0.006). Cells expressing control shRNA exhibited an 86% reduced

370 migration in the presence of palmitic acid compared to BSA-treated conditions (Figure 6C,  
371  $P=0.0003$ ), which is consistent with our previous observations. Remarkably, migration was  
372 completely restored following palmitic acid exposure in shPAI1-expressing EVT<sub>s</sub> (Figure 6C,  
373  $P<0.0001$  compared to control shRNA-expressing EVT<sub>s</sub> exposed to palmitic acid). Our results  
374 demonstrate that the anti-migratory functions of palmitic acid on EVT<sub>s</sub> are due, at least in part,  
375 to elevated PAI1 expression.

376

377 **Palmitic acid inhibits EVT differentiation in placental explants.**

378 Primary placental explants were used to further investigate the effects of palmitic acid on  
379 EVT cell invasion *ex vivo*. Explants can be used to recapitulate the multiple stages of EVT  
380 lineage development, including proliferative PCNA-positive proximal column EVT<sub>s</sub> and  
381 invasive HLAG-positive distal column EVT<sub>s</sub> (Figure 7A). After 72 h in culture with SMC  
382 conditioned media, EVT outgrowth was apparent in all explants, although those exposed to  
383 palmitic acid exhibited a 2-fold increased EVT outgrowth area as compared to those exposed to  
384 BSA (Figure 7B,  $P=0.04$ ). However, explants exposed to palmitic acid exhibited a 35% decrease  
385 in depth of EVT invasion into Matrigel in comparison to those exposed to BSA (Figure 7C,  
386  $P=0.01$ ), suggesting that palmitic acid impaired the invasive capacity of distal column EVT<sub>s</sub>.

387



## 388 **Discussion**

389           EVT invasion is a critical component of normal placentation and maintenance of a  
390 healthy pregnancy. Since EVTs typically migrate toward uterine structures containing smooth  
391 muscle (myometrium, uterine glands, endometrial veins, spiral arteries) [1], we first tested the  
392 hypothesis that EVTs are driven to migrate toward SMCs. We found that factors produced by  
393 contractile vascular SMCs stimulate phosphorylation of ERK1/2 and P38-MAPK in HTR8  
394 EVTs, resulting in enhanced migration and invasion of these cells. We further show that palmitic  
395 acid restrains EVT motility and increases expression of several inflammatory factors in EVTs,  
396 most notably PAI1, and that the effects of palmitic acid on EVT motility are restored by reducing  
397 expression of PAI1. Our results provide new insights into mechanisms of EVT migration, with  
398 important implications for pathophysiological conditions such as obesity, which are  
399 characterized by elevated levels of palmitic acid and a higher incidence of placental dysfunction.

400           Although EVTs migrate toward many different uterine structures, the best understood  
401 paradigm is their migration toward spiral arteries. EVTs home toward spiral arteries using both  
402 interstitial and endovascular routes and transform these vessels by displacing endothelial cells  
403 and SMCs. Previous studies have shown that EVTs and EVT cell-lines trigger SMC migration  
404 and apoptosis, indicating that EVTs and SMCs are capable of dynamic cellular crosstalk [34–  
405 36]. To the best of our knowledge, our study is the first to show that EVT migration is triggered  
406 by factors secreted by contractile vascular SMCs. Although we did not deduce which factors  
407 produced by SMCs are responsible for stimulating EVT migration, we did profile a select  
408 number of growth factors produced by contractile vascular SMCs (not shown), and detected high  
409 expression of platelet-derived growth factor (PDGF), epidermal growth factor (EGF), and  
410 heparin-binding EGF-like growth factor (HB-EGF). PDGF, EGF, and HB-EGF stimulate human

411 EVT adhesion, migration and invasion [37–40], so it is possible that production of these growth  
412 factors by vascular SMCs contributes to the enhanced EVT migration observed in our study.  
413 Regardless of which factors are involved, we show that SMC conditioned media activates  
414 ERK1/2 and P38-MAPK signaling pathways in EVTs, and inhibition of either pathway inhibits  
415 EVT migration, which is consistent with previous reports [41].

416 Maternal obesity is a pregestational factor associated with a higher risk of placental  
417 dysfunction [42,43]. Pregnant obese women, and those with excessive gestational weight gain,  
418 have increased saturated fatty acids circulating in blood, most prominently palmitic acid [14,44].  
419 Palmitic acid concentrations are normally maintained under stringent homeostatic control, likely  
420 due to its essential role in cell membrane structural properties, synthesis of  
421 palmitoylethanolamide, and protein palmitoylation. Palmitic acid is metabolized in cells into  
422 saturated phospholipids (e.g. lysophosphatidylcholine), diacylglycerol, and ceramides, high  
423 levels of which can alter cellular signaling events, including oxidative and endoplasmic  
424 reticulum stress and activation of protein kinase C. Palmitic acid is also a toll-like receptor  
425 agonist, and can stimulate inflammatory responses through myeloid differentiation factor  
426 88/nuclear factor kappa B and interferon regulatory factor 3-dependent pathways (reviewed in  
427 [32]). Thus, palmitic acid is a highly bioactive molecule with the potential to alter cellular gene  
428 expression, metabolism, and behavior. We found that palmitic acid decreased viability of HTR8  
429 EVTs cells at concentrations of 250 and 500  $\mu\text{M}$ , but cell viability was unaffected at 125  $\mu\text{M}$ ,  
430 which is why this dose was used for our experiments. Although the concentration of palmitic  
431 acid present at the maternal-placental interface during early pregnancy is not known, 125  $\mu\text{M}$   
432 palmitic acid is consistent with other cell culture studies modeling hyperlipidemia seen in obesity  
433 and related comorbidities [45–50]. Others have reported compromised trophoblast viability

434 following exposure to high doses of palmitic acid, including endoplasmic reticulum stress,  
435 proliferation defects, and reduced viability in HTR8 EVT<sub>s</sub> exposed to 400 and 800  $\mu$ M palmitic  
436 acid, as well as lipotoxicity in human syncytiotrophoblast exposed to 200 and 400  $\mu$ M palmitic  
437 acid [51,52]. Our study is the first to show the effect of palmitic acid on EVT motility at  
438 sublethal doses. Palmitic acid can either stimulate [53–55] or inhibit [56–58] migration of  
439 distinct cell-types, suggesting that the impact of palmitic acid on cell motility is likely dose, cell-  
440 type, and context-specific. We found that palmitic acid attenuated migration and invasion of  
441 HTR8 EVT<sub>s</sub>, and reduced EVT invasion in first trimester placental explants, whereas there was  
442 no effect on EVT motility when cells were exposed to an unsaturated fatty acid, oleic acid.  
443 Furthermore, palmitic acid induced expression of several genes encoding inflammatory (*IL6*,  
444 *CXCL8*), vasoactive (*EDNI*), and fibrogenic (*SERPINE1*) proteins, all of which are increased in  
445 serum of obese patients [59,60] and in various pregnancy complications [22,61]. High levels of  
446 palmitic acid in susceptible pregnancies may therefore contribute to a suboptimal  
447 microenvironment at the maternal-placental interface that impairs EVT motility and predisposes  
448 to deficient placentation.

449 In the current study, we detected elevated levels of PAI1 in women with early-onset  
450 preeclampsia compared to age-matched controls, which is consistent with several other studies  
451 [62–64]. Unfortunately, we did not have patient consent to obtain additional information such as  
452 body mass index or palmitic acid concentrations in blood, so correlating these parameters with  
453 PAI1 concentrations is the subject of future investigations. High levels of PAI1 may impede  
454 placental development by promoting occlusive lesions and deposition of fibrin within placental  
455 vasculature [65], as well as restricting EVT migration by inhibiting degradation of extracellular  
456 matrices [66–68]. Conversely, low expression of PAI1 is associated with uncontrolled

457 trophoblast invasion in molar pregnancies [66]. In the current study, treatment of HTR8 EVT  
458 with palmitic acid increased PAI1 expression. Palmitic acid induces PAI1 in other cell-types  
459 (e.g. renal epithelial cells), indicating that high circulating levels of palmitic acid may enhance  
460 PAI1 production by many tissues, resulting in elevated systemic levels of this protein [21]. We  
461 found that knocking down expression of PAI1 did not affect migration of EVTs in control  
462 conditions, which we attribute to EVTs already migrating at high capacity. Intriguingly, when  
463 EVTs were exposed to palmitic acid, motility was abrogated in control cells but completely  
464 restored in PAI1-deficient cells. Antibody-mediated neutralization of PAI1 also rescues EVT  
465 migration following exposure to the pro-inflammatory cytokine tumor necrosis factor alpha [69].  
466 Increased PAI1 levels may therefore contribute to poor EVT migration and deficient placentation  
467 in various pathophysiological conditions, such as in pregnancies with high plasma levels of  
468 palmitic acid or inflammatory cytokines.

469         In sum, our findings show that EVT migration is stimulated by SMCs, and that palmitic  
470 acid interferes with this process. We recognize that palmitic acid is only one factor of many  
471 circulating at aberrant levels in blood of patients with metabolic disturbances such as obesity that  
472 may influence EVT gene expression signatures and migratory phenotypes. However, palmitic  
473 acid is the most common saturated fatty acid circulating in human blood [70], and our data show  
474 that it is sufficient to induce inflammatory and fibrogenic mediators in EVTs. Thus, altered  
475 levels of this particular fatty acid may have major impacts on trophoblast function and placental  
476 development. We exploited HTR8 EVTs for analysis of PAI1 expression and knockdown since  
477 these cells are advantageous as models of migratory first trimester EVTs and are amenable to  
478 stable incorporation of shRNAs. Although technical limitations precluded us from using shRNA  
479 to disrupt PAI1 expression in placental explants, in future studies it would be interesting to

480 determine whether neutralization of PAI1 via recently-developed pharmacological inhibitors  
481 [71], is sufficient to restore EVT invasion following exposure to palmitic acid. Our findings are  
482 in support of others [72], who suggest that monitoring PAI1 levels may have diagnostic utility as  
483 a biomarker to predict placental insufficiency. Furthermore, our study opens doors to new  
484 therapeutic interventions in which managing levels of palmitic acid or PAI1 to within a “normal”  
485 physiological range may help to restore trophoblast function and prevent dysfunctional  
486 placentation. Considering the current prevalence of obesity in women of child-bearing age, this  
487 intervention may be useful in reducing the high-risk of adverse pregnancy outcomes common to  
488 obese pregnancies.

489 **Acknowledgments**

490 The authors wish to thank Peeyush Lala (University of Western Ontario) for providing HTR8  
491 EVT; and Kristin Chadwick and Dendra Hillier (University of Western Ontario) for technical  
492 support. The authors thank the donors, the Research Centre for Women's and Infants' Health  
493 BioBank Program at the Lunenfeld-Tanenbaum Research Institute, and the Mount Sinai Hospital  
494 and University Hospital Network Department of Obstetrics & Gynecology for the human  
495 specimens used in this study.

496

497 **Funding**

498 This study was funded through grants awarded from the Canadian Institutes of Health Research  
499 (386134 and 376512, to SJR), with personnel support from the Natural Sciences and Engineering  
500 Research Council of Canada and the Ontario Early Researcher Awards. AMR was supported, in  
501 part, by a fellowship from the Children's Health Research Institute (London, Canada). CD and  
502 SJL were supported by a foundation award from CIHR FDN143262.

503

504 **Declaration of Competing Interest**

505 The authors declare no conflict of interest.

506

507 **Figure Legends**

508

509 **Figure 1. Contractile SMCs enhance migration and invasion of EVT.** (A) Schematic of co-  
510 culture design with SMCs. Relative number of HTR8 EVTs that migrated (B) and invaded (C) in  
511 the presence of SMCs. Controls (Ctrl) consisted of wells not containing SMCs. Representative  
512 images of membranes are included above each graph (the black circles represent pores within the  
513 transwell membrane; cells appear purple). (D) Schematic of experimental design, showing  
514 transwells containing HTR8 EVTs placed into wells containing SMC conditioned media (CM).  
515 Relative number of HTR8 EVTs that migrated (E) and invaded (F) in the presence of SMC CM.  
516 Ctrl represents cells migrating toward unconditioned media. Representative images of  
517 membranes are included above each graph. (G) Percentage of EdU-positive HTR8 EVTs after  
518 exposure to SMC CM in comparison to cells immersed in unconditioned media (Ctrl).  
519 Representative images are shown to the left of the graph. Nuclei were detected using Hoechst.  
520 (H) Trypan blue viability assay showing total live cell counts of HTR8 EVTs exposed to SMC  
521 CM compared to Ctrl (unconditioned media). Graphs represent means  $\pm$  SEM. Migration and  
522 invasion assays were conducted using 3 membranes per treatment from each of 3 independent  
523 experiments. Proliferation and viability experiments: N=3. Asterisks denote statistical  
524 significance (\*\*\*,  $P < 0.001$ ; \*\*\*\*,  $P < 0.0001$ ). Scale bar = 100  $\mu$ M.

525

526 **Figure 2. SMCs induce phosphorylation of P38-MAPK and ERK1/2 in EVTs.** (A) Western  
527 blot depicting phosphorylated and total levels of P38-MAPK, ERK1/2, and FAK in HTR8 EVTs  
528 following exposure to SMC conditioned medium (CM) for 0.5, 1, 2 or 3 h. Cells not exposed to  
529 CM were used as a control (Ctrl).  $\beta$ -tubulin was used as a loading control. Uncropped images of

530 the western blots are provided in Supplemental Figure 5. Relative number of HTR8 EVT<sub>s</sub> that  
531 migrated toward SMC CM containing **(B)** SB203580 (P38-MAPK inhibitor) or **(C)** U0126  
532 (MEK inhibitor) in comparison to media containing DMSO. Representative images of  
533 membranes are shown above each graph (the black circles represent pores within the transwell  
534 membrane; cells appear purple). Graphs represent means  $\pm$  SEM. Western blots: N=3  
535 independent experiments; migration assays were conducted using 3 membranes per treatment  
536 from each of 3 independent experiments. Asterisks denote statistical significance (\*\*\*\*,  
537 P<0.0001).

538  
539 **Figure 3. Palmitic acid attenuates SMC-induced EVT migration and invasion.** Relative  
540 number of HTR8 EVT<sub>s</sub> that **(A)** migrated or **(B)** invaded through Matrigel in the presence of  
541 SMC conditioned media containing either 125  $\mu$ M oleic acid (OA) or 125  $\mu$ M palmitic acid  
542 (PA). Controls (Ctrl) consisted of cells migrating or invading toward SMC conditioned media  
543 containing BSA. Representative images of membranes are included above each graph (the black  
544 circles represent pores within the transwell membrane; cells appear purple). **(C)** Flow cytometry  
545 analysis of annexin V and PI-positive (apoptotic) and PI-positive (necrotic) HTR8 EVT<sub>s</sub> treated  
546 with BSA (Ctrl), OA, PA, or camptothecin (+ve Ctrl). Percentage of apoptotic and necrotic cells  
547 are shown to the right of the images. Gating strategies and single-stained controls can be found  
548 in Supplemental Figure 1. Graphs represent means  $\pm$  SEM. Migration and invasion assays were  
549 conducted using 3 membranes per treatment from each of 3 independent experiments. Flow  
550 cytometry: N=3. Asterisks denote statistical significance (\*, P<0.05; \*\*, P<0.01; \*\*\*\*,  
551 P<0.0001).

552



553 **Figure 4. Palmitic acid induces production of inflammatory factors in EVT.** (A) PCR array  
554 depicting transcript levels of various inflammatory factors following 24-h exposure to SMC  
555 conditioned media containing BSA (Ctrl) or 125  $\mu$ M palmitic acid (PA). Transcript levels from  
556 Ctrl conditions are represented by the solid line. Transcripts increased >2-fold (demarcated by  
557 the dashed line) following PA exposure are bolded. A heat map is shown below the graph. (B)  
558 Transcript levels of *VEGFA*, *LIF*, *EDN1*, *IL6*, *CXCL8*, and *SERPINE1* in HTR8 EVTs after a 24-  
559 hour exposure to SMC conditioned media containing BSA (Ctrl) or 125  $\mu$ M PA. (C) Levels of  
560 PAI1 in media conditioned by HTR8 EVTs following 24-hour exposure to SMC conditioned  
561 media containing BSA (Ctrl) or 125  $\mu$ M PA. Graphs in (B) and (C) represent means  $\pm$  SEM  
562 based on N=3 independent experiments. Asterisks denote statistical significance (\*, P<0.05; \*\*,  
563 P<0.01; \*\*\*, P<0.001).

564  
565 **Figure 5. PAI1 is increased in plasma from women with preeclampsia.** Plasma was isolated  
566 from non-pregnant women (Not Preg; N=6), pregnant women in second trimester (N=10), and  
567 pregnant women in early third trimester without preeclampsia (N=9) or with early-onset  
568 preeclampsia (PE; N=8). Levels of PAI1 in plasma were detected using a Bio-Plex Assay. Data  
569 are shown as box plots. Asterisks denote statistical significance comparing third trimester  
570 samples with and without preeclampsia (\*\*\*\*, P<0.0001).

571  
572 **Figure 6. Knockdown of PAI1 restores EVT migration following exposure to palmitic acid.**  
573 (A) Transcript levels of *SERPINE1* in HTR8 EVTs expressing shPAI1 compared to cells  
574 expressing control shRNA (scrambled; SCR). (B) Levels of PAI1 from media conditioned by  
575 HTR8 EVTs expressing SCR or shPAI1. (C) Relative number of HTR8 EVTs expressing SCR

576 or shPAI1 that migrated toward SMC conditioned media containing BSA (Ctrl) or palmitic acid  
577 (PA). Representative images of membranes are shown above the graph (the black circles  
578 represent pores within the transwell membrane; cells appear purple). Graphs represent means  $\pm$   
579 SEM. (A) and (B) represent data from 3 independent experiments; (C) represents data obtained  
580 using 3 membranes per treatment from each of 3 independent experiments. Asterisks denote  
581 statistical significance (\*,  $P < 0.05$ ; \*\*,  $P < 0.01$ ; \*\*\*,  $P < 0.001$ ).

582

583 **Figure 7. Increased outgrowth and impaired EVT invasion in first trimester placental**  
584 **explants exposed to palmitic acid.** (A) 8-week placental explants cultured for 96 h stained with  
585 hematoxylin and eosin (H&E), PCNA, and HLAG. Nuclei were detected using DAPI. (B)  
586 Relative change in placental explant outgrowth area after exposure to SMC conditioned media  
587 containing BSA (Ctrl) or 125  $\mu$ M palmitic acid (PA). Representative images of the explants are  
588 depicted above the graph. (C) Depth of EVT invasion into Matrigel following exposure to SMC  
589 conditioned media containing BSA (Ctrl) or PA. Graphs represent means  $\pm$  SEM based on 3  
590 explants prepared from each of 6 different placentas. Asterisks denote statistical significance (\*,  
591  $P < 0.05$ ). Scale bar = 100  $\mu$ m.

592

593

594 **References**

- 595 [1] Moser G, Windsperger K, Pollheimer J, de Sousa Lopes SC, Huppertz B. Human  
596 trophoblast invasion: new and unexpected routes and functions. *Histochem Cell Biol*  
597 2018;150:361–70. doi:10.1007/s00418-018-1699-0.
- 598 [2] Whitley GSJ, Cartwright JE. Trophoblast-mediated spiral artery remodelling: a role for  
599 apoptosis. *J Anat* 2009;215:21–6. doi:10.1111/j.1469-7580.2008.01039.x.
- 600 [3] James JL, Cartwright JE, Whitley GS, Greenhill DR, Hoppe A. The regulation of  
601 trophoblast migration across endothelial cells by low shear stress: consequences for  
602 vascular remodelling in pregnancy. *Cardiovasc Res* 2012;93:152–61.  
603 doi:10.1093/cvr/cvr276.
- 604 [4] Lyall F, Robson SC, Bulmer JN. Spiral artery remodeling and trophoblast invasion in  
605 preeclampsia and fetal growth restriction: relationship to clinical outcome. *Hypertension*  
606 2013;62:1046–54. doi:10.1161/HYPERTENSIONAHA.113.01892.
- 607 [5] Åmark H, Westgren M, Persson M. Prediction of stillbirth in women with overweight or  
608 obesity-A register-based cohort study. *PLoS One* 2018;13:e0206940.  
609 doi:10.1371/journal.pone.0206940.
- 610 [6] Roberts JM, Bodnar LM, Patrick TE, Powers RW. The role of obesity in preeclampsia.  
611 *Pregnancy Hypertension* 2011;1:6–16. doi:10.1016/j.preghy.2010.10.013.
- 612 [7] Lynch CM, Sexton DJ, Hession M, Morrison JJ. Obesity and mode of delivery in  
613 primigravid and multigravid women. *Am J Perinatol* 2008;25:163–7. doi:10.1055/s-2008-  
614 1061496.
- 615 [8] Leddy MA, Power ML, Schulkin J. The impact of maternal obesity on maternal and fetal  
616 health. *Rev Obstet Gynecol* 2008;1:170–8.

- 617 [9] Avagliano L, Marconi AM, Romagnoli S, Bulfamante GP. Abnormal spiral arteries  
618 modification in stillbirths: the role of maternal prepregnancy body mass index. *J Matern*  
619 *Fetal Neonatal Med* 2012;25:2789–92. doi:10.3109/14767058.2012.705395.
- 620 [10] Hayes EK, Tessier DR, Percival ME, Holloway AC, Petrik JJ, Gruslin A, et al.  
621 Trophoblast invasion and blood vessel remodeling are altered in a rat model of lifelong  
622 maternal obesity. *Reprod Sci* 2014;21:648–57. doi:10.1177/1933719113508815.
- 623 [11] Jensen MD, Haymond MW, Rizza RA, Cryer PE, Miles JM. Influence of body fat  
624 distribution on free fatty acid metabolism in obesity. *J Clin Invest* 1989;83:1168–73.  
625 doi:10.1172/JCI113997.
- 626 [12] Boden G. Obesity and free fatty acids. *Endocrinol Metab Clin North Am* 2008;37:635–46,  
627 viii. doi:10.1016/j.ecl.2008.06.007.
- 628 [13] Yew Tan C, Virtue S, Murfitt S, Roberts LD, Phua YH, Dale M, et al. Adipose tissue fatty  
629 acid chain length and mono-unsaturation increases with obesity and insulin resistance. *Sci*  
630 *Rep* 2015;5:18366. doi:10.1038/srep18366.
- 631 [14] Vidakovic AJ, Jaddoe VWV, Gishti O, Felix JF, Williams MA, Hofman A, et al. Body  
632 mass index, gestational weight gain and fatty acid concentrations during pregnancy: the  
633 Generation R Study. *Eur J Epidemiol* 2015;30:1175–85. doi:10.1007/s10654-015-0106-6.
- 634 [15] Korbecki J, Bajdak-Rusinek K. The effect of palmitic acid on inflammatory response in  
635 macrophages: an overview of molecular mechanisms. *Inflamm Res* 2019.  
636 doi:10.1007/s00011-019-01273-5.
- 637 [16] Gupta S, Knight AG, Gupta S, Keller JN, Bruce-Keller AJ. Saturated long-chain fatty  
638 acids activate inflammatory signaling in astrocytes. *J Neurochem* 2012;120:1060–71.  
639 doi:10.1111/j.1471-4159.2012.07660.x.

- 640 [17] Zhou B, Zhang J, Zhang Q, Permatasari F, Xu Y, Wu D, et al. Palmitic acid induces  
641 production of proinflammatory cytokines interleukin-6, interleukin-1 $\beta$ , and tumor necrosis  
642 factor- $\alpha$  via a NF- $\kappa$ B-dependent mechanism in HaCaT keratinocytes. *Mediators Inflamm*  
643 2013;2013:530429. doi:10.1155/2013/530429.
- 644 [18] Tian H, Liu C, Zou X, Wu W, Zhang C, Yuan D. MiRNA-194 Regulates Palmitic Acid-  
645 Induced Toll-Like Receptor 4 Inflammatory Responses in THP-1 Cells. *Nutrients*  
646 2015;7:3483–96. doi:10.3390/nu7053483.
- 647 [19] Sergi D, Morris AC, Kahn DE, McLean FH, Hay EA, Kubitz P, et al. Palmitic acid  
648 triggers inflammatory responses in N42 cultured hypothalamic cells partially via ceramide  
649 synthesis but not via TLR4. *Nutr Neurosci* 2018:1–14.  
650 doi:10.1080/1028415X.2018.1501533.
- 651 [20] Yang X, Haghiac M, Glazebrook P, Minium J, Catalano PM, Hauguel-de Mouzon S.  
652 Saturated fatty acids enhance TLR4 immune pathways in human trophoblasts. *Hum*  
653 *Reprod* 2015;30:2152–9. doi:10.1093/humrep/dev173.
- 654 [21] Jeong BY, Uddin MJ, Park JH, Lee JH, Lee HB, Miyata T, et al. Novel Plasminogen  
655 Activator Inhibitor-1 Inhibitors Prevent Diabetic Kidney Injury in a Mouse Model. *PLoS*  
656 *One* 2016;11:e0157012. doi:10.1371/journal.pone.0157012.
- 657 [22] Ye Y, Vattai A, Zhang X, Zhu J, Thaler CJ, Mahner S, et al. Role of plasminogen  
658 activator inhibitor type 1 in pathologies of female reproductive diseases. *Int J Mol Sci*  
659 2017;18. doi:10.3390/ijms18081651.
- 660 [23] Cotechini T, Graham CH. Aberrant maternal inflammation as a cause of pregnancy  
661 complications: A potential therapeutic target? *Placenta* 2015;36:960–6.  
662 doi:10.1016/j.placenta.2015.05.016.

- 663 [24] Challier JC, Basu S, Bintein T, Minium J, Hotmire K, Catalano PM, et al. Obesity in  
664 pregnancy stimulates macrophage accumulation and inflammation in the placenta. *Placenta*  
665 2008;29:274–81. doi:10.1016/j.placenta.2007.12.010.
- 666 [25] Renaud SJ, Cotechini T, Quirt JS, Macdonald-Goodfellow SK, Othman M, Graham CH.  
667 Spontaneous pregnancy loss mediated by abnormal maternal inflammation in rats is linked  
668 to deficient uteroplacental perfusion. *J Immunol* 2011;186:1799–808.  
669 doi:10.4049/jimmunol.1002679.
- 670 [26] Baines KJ, Rampersaud AM, Hillier DM, Jeyarajah MJ, Grafham GK, Eastabrook G, et al.  
671 Antiviral Inflammation during Early Pregnancy Reduces Placental and Fetal Growth  
672 Trajectories. *J Immunol* 2020;204:694–706. doi:10.4049/jimmunol.1900888.
- 673 [27] Graham CH, Hawley TS, Hawley RG, MacDougall JR, Kerbel RS, Khoo N, et al.  
674 Establishment and characterization of first trimester human trophoblast cells with extended  
675 lifespan. *Exp Cell Res* 1993;206:204–11. doi:10.1006/excr.1993.1139.
- 676 [28] Nadeem L, Munir S, Fu G, Dunk C, Baczyk D, Caniggia I, et al. Nodal signals through  
677 activin receptor-like kinase 7 to inhibit trophoblast migration and invasion: implication in  
678 the pathogenesis of preeclampsia. *Am J Pathol* 2011;178:1177–89.  
679 doi:10.1016/j.ajpath.2010.11.066.
- 680 [29] Schneider CA, Rasband WS, Eliceiri KW. NIH Image to ImageJ: 25 years of image  
681 analysis. *Nat Methods* 2012;9:671–5. doi:10.1038/nmeth.2089.
- 682 [30] Jeyarajah MJ, Jaju Bhattad G, Kops BF, Renaud SJ. Syndecan-4 regulates extravillous  
683 trophoblast migration by coordinating protein kinase C activation. *Sci Rep* 2019;9:10175.  
684 doi:10.1038/s41598-019-46599-6.
- 685 [31] Jaju Bhattad G, Jeyarajah MJ, McGill MG, Dumeaux V, Okae H, Arima T, et al. Histone

- 686 deacetylase 1 and 2 drive differentiation and fusion of progenitor cells in human placental  
687 trophoblasts. *Cell Death Dis* 2020;11:311. doi:10.1038/s41419-020-2500-6.
- 688 [32] Korbecki J, Bajdak-Rusinek K. The effect of palmitic acid on inflammatory response in  
689 macrophages: an overview of molecular mechanisms. *Inflamm Res* 2019.  
690 doi:10.1007/s00011-019-01273-5.
- 691 [33] Mavri A, Stegnar M, Krebs M, Sentocnik JT, Geiger M, Binder BR. Impact of adipose  
692 tissue on plasma plasminogen activator inhibitor-1 in dieting obese women. *Arterioscler*  
693 *Thromb Vasc Biol* 1999;19:1582–7. doi:10.1161/01.atv.19.6.1582.
- 694 [34] Harris LK, Keogh RJ, Wareing M, Baker PN, Cartwright JE, Aplin JD, et al. Invasive  
695 trophoblasts stimulate vascular smooth muscle cell apoptosis by a fas ligand-dependent  
696 mechanism. *Am J Pathol* 2006;169:1863–74. doi:10.2353/ajpath.2006.060265.
- 697 [35] Salomon C, Yee S, Scholz-Romero K, Kobayashi M, Vaswani K, Kvaskoff D, et al.  
698 Extravillous trophoblast cells-derived exosomes promote vascular smooth muscle cell  
699 migration. *Front Pharmacol* 2014;5:175. doi:10.3389/fphar.2014.00175.
- 700 [36] Bulmer JN, Innes BA, Levey J, Robson SC, Lash GE. The role of vascular smooth muscle  
701 cell apoptosis and migration during uterine spiral artery remodeling in normal human  
702 pregnancy. *FASEB J* 2012;26:2975–85. doi:10.1096/fj.12-203679.
- 703 [37] Bolnick AD, Bolnick JM, Kohan-Ghadr H-R, Kilburn BA, Pasalodos OJ, Singhal PK, et  
704 al. Enhancement of trophoblast differentiation and survival by low molecular weight  
705 heparin requires heparin-binding EGF-like growth factor. *Hum Reprod* 2017;32:1218–29.  
706 doi:10.1093/humrep/dex069.
- 707 [38] Han J, Li L, Hu J, Yu L, Zheng Y, Guo J, et al. Epidermal growth factor stimulates human  
708 trophoblast cell migration through Rho A and Rho C activation. *Endocrinology*

- 709 2010;151:1732–42. doi:10.1210/en.2009-0845.
- 710 [39] Wright JK, Dunk CE, Amsalem H, Maxwell C, Keating S, Lye SJ. HER1 signaling  
711 mediates extravillous trophoblast differentiation in humans. *Biol Reprod* 2010;83:1036–45.  
712 doi:10.1095/biolreprod.109.083246.
- 713 [40] Silva JF, Serakides R. Intrauterine trophoblast migration: A comparative view of humans  
714 and rodents. *Cell Adh Migr* 2016;10:88–110. doi:10.1080/19336918.2015.1120397.
- 715 [41] Renaud SJ, Kubota K, Rumi MAK, Soares MJ. The FOS transcription factor family  
716 differentially controls trophoblast migration and invasion. *J Biol Chem* 2014;289:5025–39.  
717 doi:10.1074/jbc.M113.523746.
- 718 [42] Avagliano L, Bulfamante GP, Morabito A, Marconi AM. Abnormal spiral artery  
719 remodelling in the decidual segment during pregnancy: from histology to clinical  
720 correlation. *J Clin Pathol* 2011;64:1064–8. doi:10.1136/jclinpath-2011-200092.
- 721 [43] Myatt L, Maloyan A. Obesity and placental function. *Semin Reprod Med* 2016;34:42–9.  
722 doi:10.1055/s-0035-1570027.
- 723 [44] Chen X, Scholl TO, Leskiw M, Savaille J, Stein TP. Differences in maternal circulating  
724 fatty acid composition and dietary fat intake in women with gestational diabetes mellitus or  
725 mild gestational hyperglycemia. *Diabetes Care* 2010;33:2049–54. doi:10.2337/dc10-0693.
- 726 [45] Hua W, Huang H, Tan L, Wan J, Gui H, Zhao L, et al. CD36 Mediated Fatty Acid-  
727 Induced Podocyte Apoptosis via Oxidative Stress. *PLoS One* 2015;10:e0127507.  
728 doi:10.1371/journal.pone.0127507.
- 729 [46] Hernández-Cáceres MP, Toledo-Valenzuela L, Díaz-Castro F, Ávalos Y, Burgos P, Narro  
730 C, et al. Palmitic acid reduces the autophagic flux and insulin sensitivity through the  
731 activation of the free fatty acid receptor 1 (FFAR1) in the hypothalamic neuronal cell line



- 732 N43/5. *Front Endocrinol (Lausanne)* 2019;10:176. doi:10.3389/fendo.2019.00176.
- 733 [47] Jiang X-S, Chen X-M, Wan J-M, Gui H-B, Ruan X-Z, Du X-G. Autophagy Protects  
734 against Palmitic Acid-Induced Apoptosis in Podocytes in vitro. *Sci Rep* 2017;7:42764.  
735 doi:10.1038/srep42764.
- 736 [48] Benoit SC, Kemp CJ, Elias CF, Abplanalp W, Herman JP, Migrenne S, et al. Palmitic acid  
737 mediates hypothalamic insulin resistance by altering PKC-theta subcellular localization in  
738 rodents. *J Clin Invest* 2009;119:2577–89. doi:10.1172/JCI36714.
- 739 [49] Frommer KW, Hasseli R, Schäffler A, Lange U, Rehart S, Steinmeyer J, et al. Free fatty  
740 acids in bone pathophysiology of rheumatic diseases. *Front Immunol* 2019;10:2757.  
741 doi:10.3389/fimmu.2019.02757.
- 742 [50] Zeng X, Zhu M, Liu X, Chen X, Yuan Y, Li L, et al. Oleic acid ameliorates palmitic acid  
743 induced hepatocellular lipotoxicity by inhibition of ER stress and pyroptosis. *Nutr Metab*  
744 (Lond) 2020;17:11. doi:10.1186/s12986-020-0434-8.
- 745 [51] Yang C, Lim W, Bazer FW, Song G. Down-regulation of stearoyl-CoA desaturase-1  
746 increases susceptibility to palmitic-acid-induced lipotoxicity in human trophoblast cells. *J*  
747 *Nutr Biochem* 2018;54:35–47. doi:10.1016/j.jnutbio.2017.11.005.
- 748 [52] Colvin BN, Longtine MS, Chen B, Costa ML, Nelson DM. Oleate attenuates palmitate-  
749 induced endoplasmic reticulum stress and apoptosis in placental trophoblasts.  
750 *Reproduction* 2017;153:369–80. doi:10.1530/REP-16-0576.
- 751 [53] Balaban S, Shearer RF, Lee LS, van Geldermalsen M, Schreuder M, Shtein HC, et al.  
752 Adipocyte lipolysis links obesity to breast cancer growth: adipocyte-derived fatty acids  
753 drive breast cancer cell proliferation and migration. *Cancer Metab* 2017;5:1.  
754 doi:10.1186/s40170-016-0163-7.

- 755 [54] Landim BC, de Jesus MM, Bosque BP, Zanon RG, da Silva CV, Góes RM, et al.  
756 Stimulating effect of palmitate and insulin on cell migration and proliferation in PNT1A  
757 and PC3 prostate cells: Counteracting role of metformin. *Prostate* 2018;78:731–42.  
758 doi:10.1002/pros.23517.
- 759 [55] Chung JH, Jeon HJ, Hong S-Y, Lee DL, Lee KH, Kim SH, et al. Palmitate promotes the  
760 paracrine effects of macrophages on vascular smooth muscle cells: the role of bone  
761 morphogenetic proteins. *PLoS One* 2012;7:e29100. doi:10.1371/journal.pone.0029100.
- 762 [56] Trombetta A, Togliatto G, Rosso A, Dentelli P, Olgasi C, Cotogni P, et al. Increase of  
763 palmitic acid concentration impairs endothelial progenitor cell and bone marrow-derived  
764 progenitor cell bioavailability: role of the STAT5/PPAR $\gamma$  transcriptional complex.  
765 *Diabetes* 2013;62:1245–57. doi:10.2337/db12-0646.
- 766 [57] Girona J, Rosales R, Saavedra P, Masana L, Vallvé J-C. Palmitate decreases migration and  
767 proliferation and increases oxidative stress and inflammation in smooth muscle cells: role  
768 of the Nrf2 signaling pathway. *Am J Physiol Cell Physiol* 2019;316:C888–97.  
769 doi:10.1152/ajpcell.00293.2018.
- 770 [58] Luo R, Li L, Li L, Yang G, Li H, Lu Y, et al. Mesenchymal stem cells ameliorate palmitic  
771 acid induced lipotoxicity of human umbilical vein endothelial cells and high-fat induced  
772 obese rats by suppression of .... *The FASEB ...* 2018.
- 773 [59] Alessi MC, Bastelica D, Morange P, Berthet B, Leduc I, Verdier M, et al. Plasminogen  
774 activator inhibitor 1, transforming growth factor-beta1, and BMI are closely associated in  
775 human adipose tissue during morbid obesity. *Diabetes* 2000;49:1374–80.  
776 doi:10.2337/diabetes.49.8.1374.
- 777 [60] Derosa G, Fogari E, D'Angelo A, Bianchi L, Bonaventura A, Romano D, et al.

- 778 Adipocytokine Levels in Obese and Non-obese Subjects: an Observational Study.  
779 Inflammation 2013;36:914–20. doi:10.1007/s10753-013-9620-4.
- 780 [61] Raghupathy R. Cytokines as key players in the pathophysiology of preeclampsia. Med  
781 Princ Pract 2013;22 Suppl 1:8–19. doi:10.1159/000354200.
- 782 [62] Bodova KB, Biringer K, Dokus K, Ivankova J, Stasko J, Danko J. Fibronectin,  
783 plasminogen activator inhibitor type 1 (PAI-1) and uterine artery Doppler velocimetry as  
784 markers of preeclampsia. Dis Markers 2011;30:191–6. doi:10.3233/DMA-2011-0772.
- 785 [63] Purwosunu Y, Sekizawa A, Koide K, Farina A, Wibowo N, Wiknjastro GH, et al. Cell-  
786 free mRNA concentrations of plasminogen activator inhibitor-1 and tissue-type  
787 plasminogen activator are increased in the plasma of pregnant women with preeclampsia.  
788 Clin Chem 2007;53:399–404. doi:10.1373/clinchem.2006.081372.
- 789 [64] Wikström A-K, Nash P, Eriksson UJ, Olovsson MH. Evidence of increased oxidative  
790 stress and a change in the plasminogen activator inhibitor (PAI)-1 to PAI-2 ratio in early-  
791 onset but not late-onset preeclampsia. Am J Obstet Gynecol 2009;201:597.e1-8.  
792 doi:10.1016/j.ajog.2009.06.024.
- 793 [65] Estellés A, Gilabert J, Keeton M, Eguchi Y, Aznar J, Grancha S, et al. Altered expression  
794 of plasminogen activator inhibitor type 1 in placentas from pregnant women with  
795 preeclampsia and/or intrauterine fetal growth retardation. Blood 1994;84:143–50.
- 796 [66] Floridon C, Nielsen O, Hølund B, Sweep F, Sunde L, Thomsen SG, et al. Does  
797 plasminogen activator inhibitor-1 (PAI-1) control trophoblast invasion? A study of fetal  
798 and maternal tissue in intrauterine, tubal and molar pregnancies. Placenta 2000;21:754–62.  
799 doi:10.1053/plac.2000.0573.
- 800 [67] Lash GE, Otun HA, Innes BA, Bulmer JN, Searle RF, Robson SC. Low oxygen

801 concentrations inhibit trophoblast cell invasion from early gestation placental explants via  
802 alterations in levels of the urokinase plasminogen activator system. *Biol Reprod*  
803 2006;74:403–9. doi:10.1095/biolreprod.105.047332.

804 [68] Renaud SJ, Postovit L-M, Macdonald-Goodfellow SK, McDonald GT, Caldwell JD,  
805 Graham CH. Activated macrophages inhibit human cytotrophoblast invasiveness in vitro.  
806 *Biol Reprod* 2005;73:237–43. doi:10.1095/biolreprod.104.038000.

807 [69] Bauer S, Pollheimer J, Hartmann J, Husslein P, Aplin JD, Knöfler M. Tumor necrosis  
808 factor-alpha inhibits trophoblast migration through elevation of plasminogen activator  
809 inhibitor-1 in first-trimester villous explant cultures. *J Clin Endocrinol Metab*  
810 2004;89:812–22. doi:10.1210/jc.2003-031351.

811 [70] Carta G, Murru E, Banni S, Manca C. Palmitic acid: physiological role, metabolism and  
812 nutritional implications. *Front Physiol* 2017;8:902. doi:10.3389/fphys.2017.00902.

813 [71] Placencio VR, Ichimura A, Miyata T, DeClerck YA. Small Molecule Inhibitors of  
814 Plasminogen Activator Inhibitor-1 Elicit Anti-Tumorigenic and Anti-Angiogenic Activity.  
815 *PLoS One* 2015;10:e0133786. doi:10.1371/journal.pone.0133786.

816 [72] Seferovic MD, Gupta MB. Increased Umbilical Cord PAI-1 Levels in Placental  
817 Insufficiency Are Associated with Fetal Hypoxia and Angiogenesis. *Dis Markers*  
818 2016;2016:7124186. doi:10.1155/2016/7124186.

819  
820

821 **Table 1. Clinical measures of patients used for quantification of PAI1 levels in plasma.**

| <b>Demographic</b>                                                      | <b>Non-Pregnant<br/>(n=6)</b> | <b>Second<br/>Trimester<br/>(n=10)</b> | <b>Third Trimester<br/>No Preeclampsia<br/>(n=9)</b> | <b>Third Trimester<br/>Preeclampsia<br/>(n=8)</b> |
|-------------------------------------------------------------------------|-------------------------------|----------------------------------------|------------------------------------------------------|---------------------------------------------------|
| <b>Age (years)</b><br>Mean<br>Range                                     | 32.43<br>25-37                | 32.52<br>20 - 42                       | 29.86<br>23 - 40                                     | 26.88<br>25 - 35                                  |
| <b>Parity</b><br>Nullipara<br>Multipara                                 | 3<br>3                        | 5<br>5                                 | 5<br>3                                               | 6<br>2                                            |
| <b>Gestational age at blood<br/>collection (weeks)</b><br>Mean<br>Range | N/A                           | 16.33<br>15.2-17.2                     | 27.80<br>26.0-29.0                                   | 29.53<br>27-34.0                                  |
| <b>Gestational age at delivery<br/>(weeks)</b><br>Mean<br>Range         | N/A                           | 38.07<br>37 - 41.1                     | 39.00<br>37.3 - 40.6                                 | 31.20*<br>28.2 – 34.4                             |
| <b>Max systolic blood pressure</b>                                      | N/A                           | 116.6 ± 11.93                          | 124.2 ± 19.83                                        | 154.79 ± 6.24*                                    |
| <b>Max diastolic blood pressure</b>                                     | N/A                           | 71 ± 7.65                              | 72.1 ± 9.89                                          | 100.33 ± 7.72*                                    |

822 (\*; P <0.05)

823

824 **Table 2. Taqman probe IDs.**

| Gene Name       | Assay ID      | Amplicon Size |
|-----------------|---------------|---------------|
| <i>EDN1</i>     | Hs00174961_m1 | 62 bp         |
| <i>IL1A</i>     | Hs00174092_m1 | 69 bp         |
| <i>IL6</i>      | Hs00174131_m1 | 95 bp         |
| <i>LIF</i>      | Hs00171455_m1 | 66 bp         |
| <i>VEGFA</i>    | Hs00173626_m1 | 77 bp         |
| <i>PTGS2</i>    | Hs00153133_m1 | 75 bp         |
| <i>RNA18SN5</i> | Hs99999901_s1 | 187 bp        |

825 bp = base pairs

826

827 **Table 3. List of primers used for qRT-PCR.**

| Gene Name       | Accession No. | Forward Primer       | Reverse Primer       |
|-----------------|---------------|----------------------|----------------------|
| <i>SERPINE1</i> | NM_000602.4   | AAGAGGTGCCTCTCTCTGCC | TAGGGGCTTCCTGAGGTCGA |
| <i>CXCL8</i>    | NM_000584.4   | AATTCATAAAAAAATTCATT | TGGTACAATGAAAAACTATT |
| <i>RNAI8SN5</i> | NR_003286.4   | GCAATTATCCCCATGAACG  | GGCCTCACTAAACCATCCAA |

828

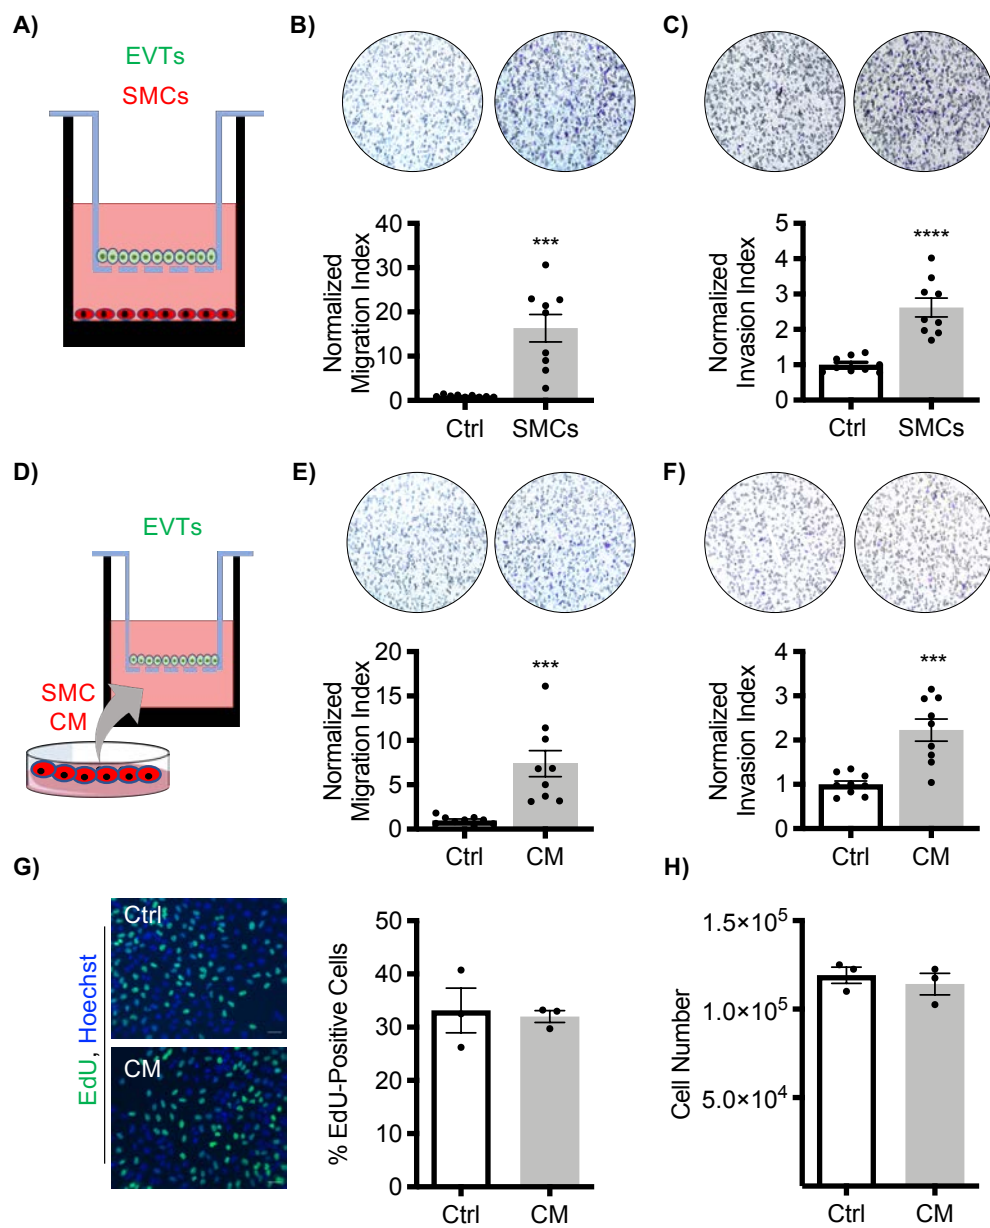

Figure 1



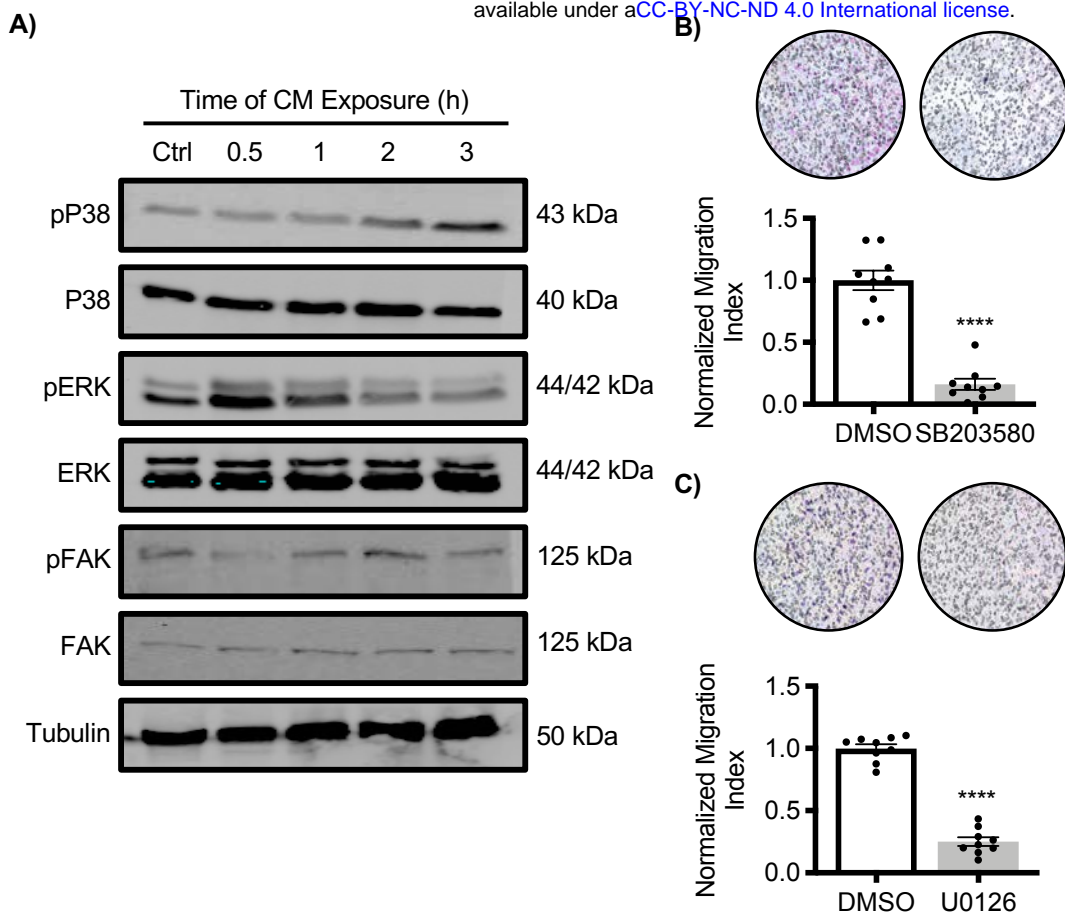

Figure 2

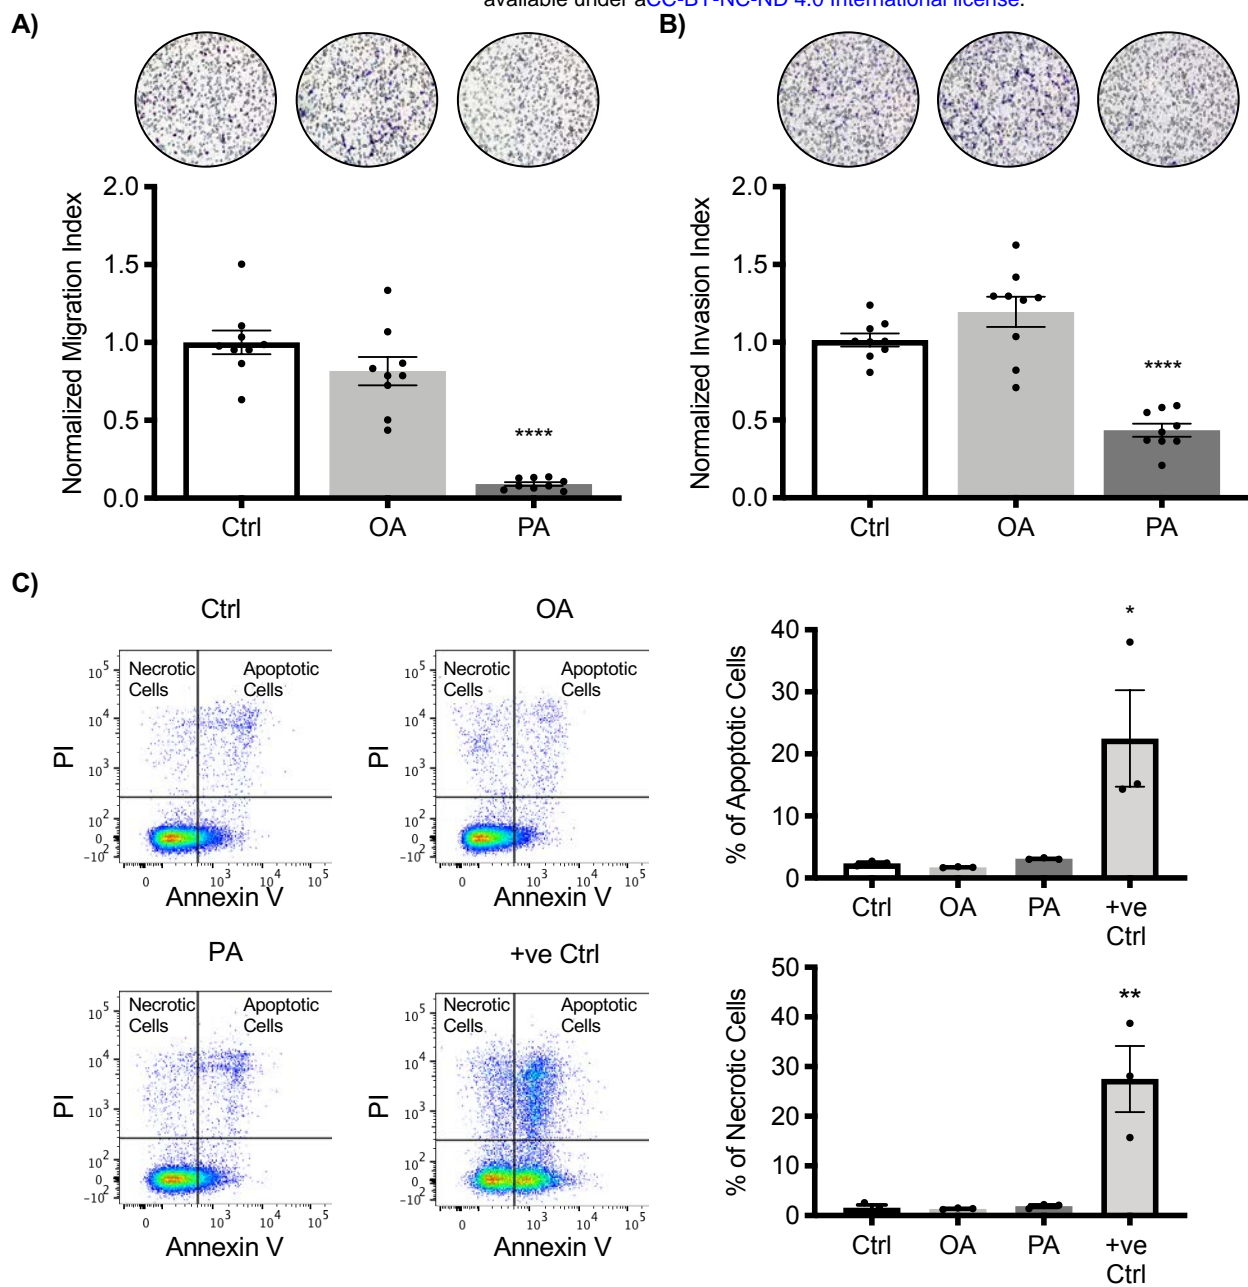

Figure 3

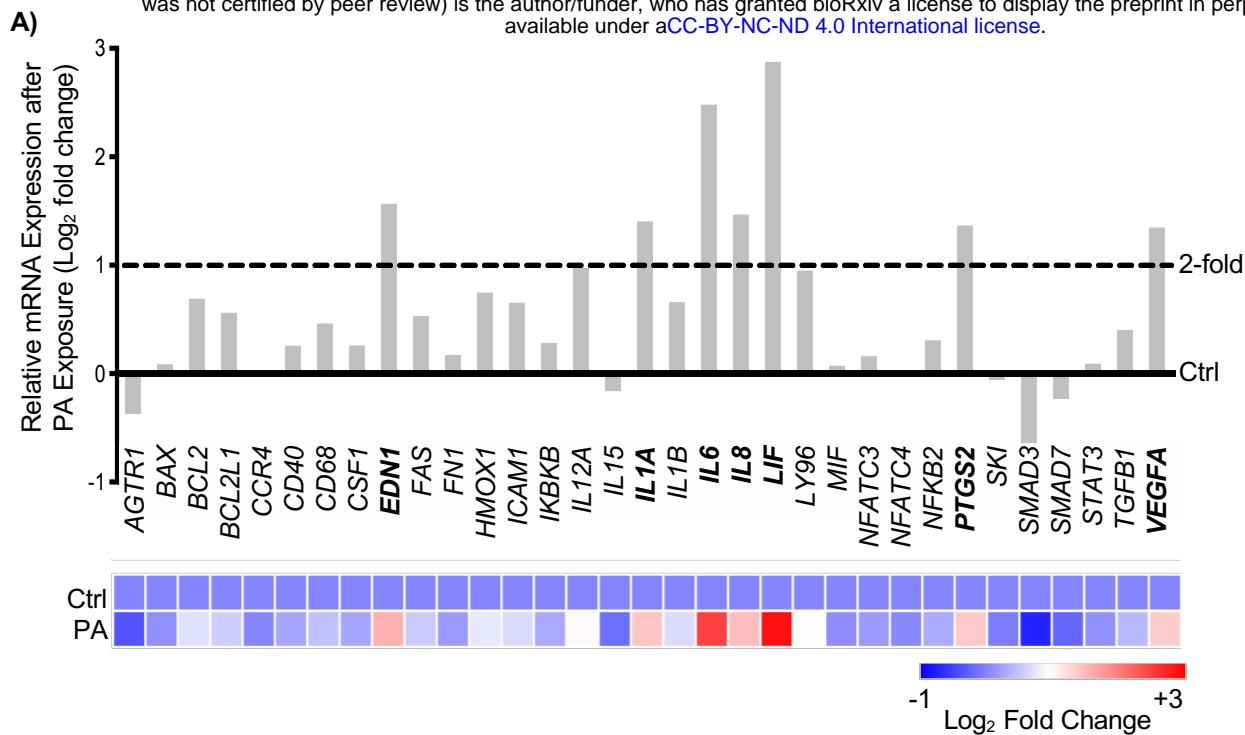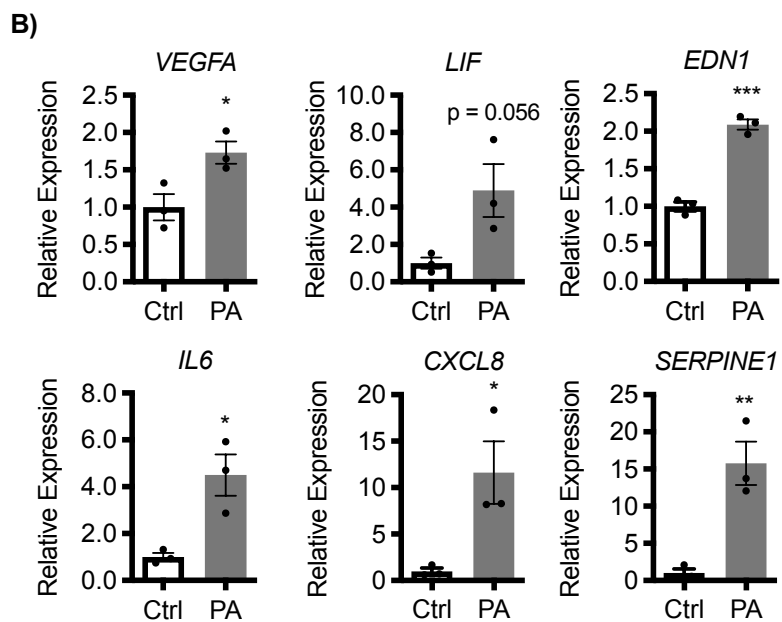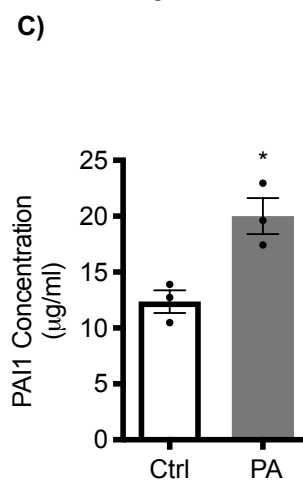

Figure 4

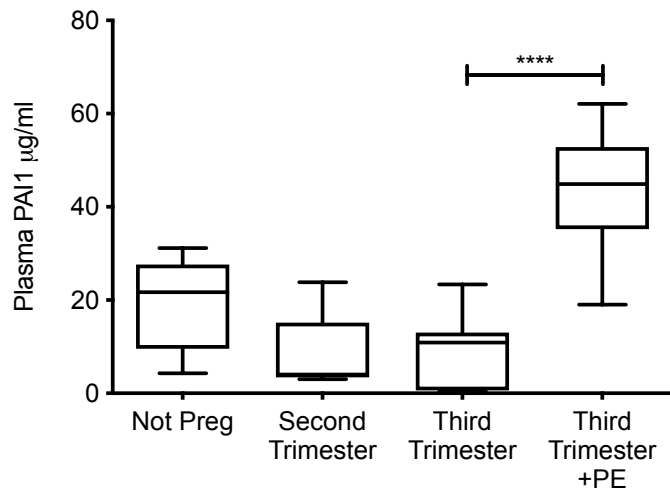

Figure 5

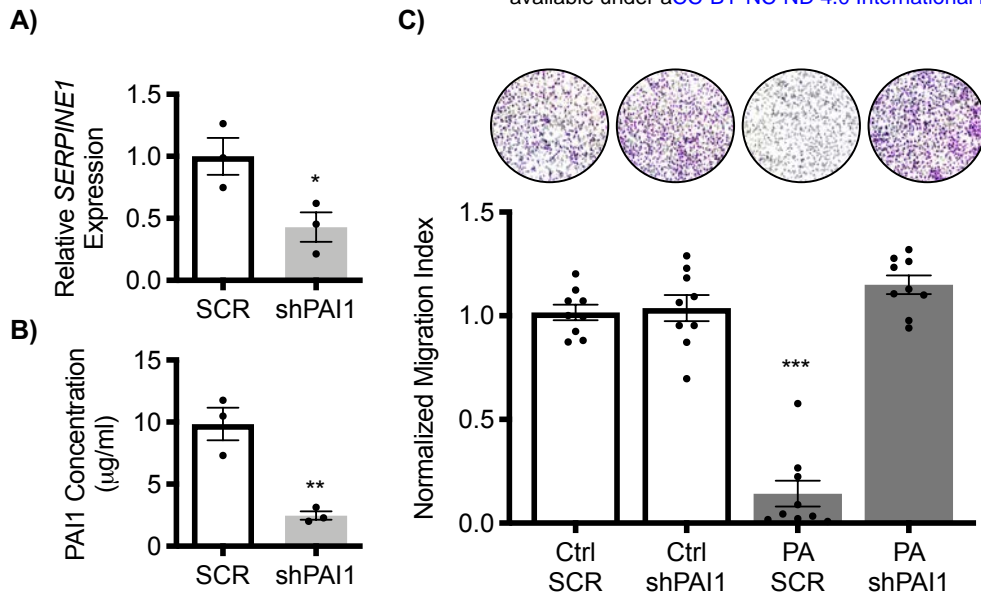

Figure 6

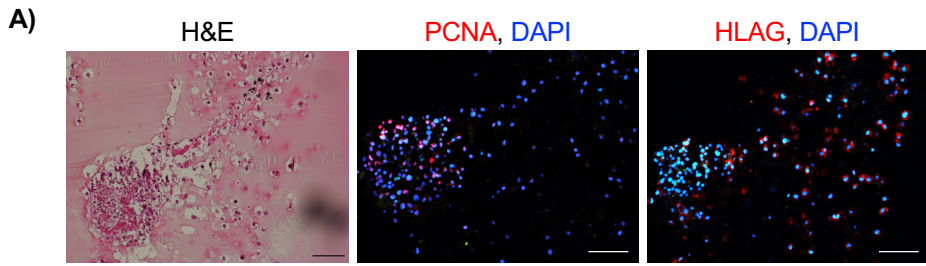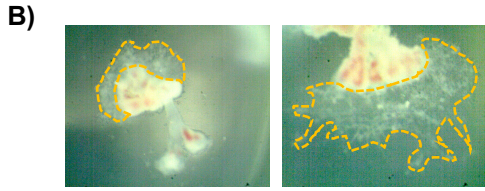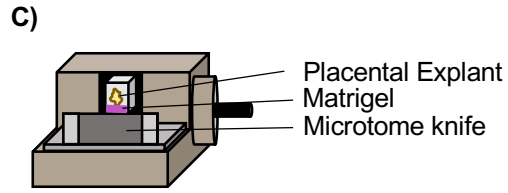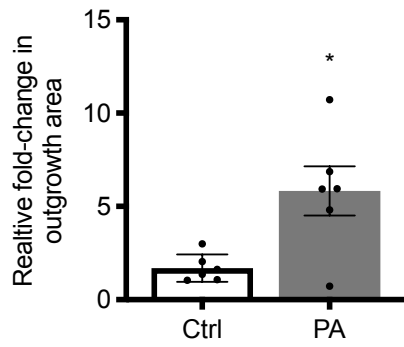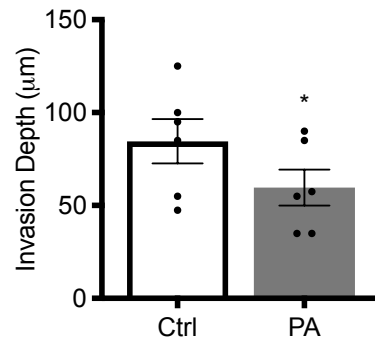

Figure 7
